# Supplementary material for: Impaired mnemonic pattern separation associated with PTSD symptoms paradoxically improves with regular cannabis use
Source: Springer Nature journal article supplement (doi:10.1038/s44184-025-00126-w), 2025-04-24
Supplement: MOESM1 [file 44184_2025_126_MOESM1_ESM.pdf]

## **Supplementary Materials for Impaired Mnemonic Pattern Separation Associated with PTSD Symptoms Paradoxically Improves with Regular Cannabis Use**

Jacob Ross<sup>1,2</sup>; Bruna Cuccurazzu<sup>3</sup>; Dylan Delmar<sup>3</sup>, Christian Cortes<sup>3</sup> Giovanni Castillo<sup>3</sup>;  
Dean T. Acheson<sup>3,4</sup>; Dewleen G. Baker<sup>3,4</sup>; Victoria B. Risbrough<sup>3,4</sup>; Daniel M. Stout<sup>3,4\*</sup>

<sup>1</sup> Department of Biological Sciences, University of California San Diego, San Diego, CA  
92093 USA

<sup>2</sup> Research Service, San Diego ORD VISN 22, VA San Diego Healthcare System, San  
Diego, CA 92161 USA

<sup>3</sup> Department of Psychiatry, University of California San Diego, San Diego, CA 92093  
USA

<sup>4</sup> Center of Excellence for Stress and Mental Health, VA San Diego Healthcare System,  
San Diego, CA 92161 USA

## Supplementary Tables

**Supplemental Table 1. General linear model in the larger ( $n=79$ ) sample subset only**

| <b>Omnibus Model</b>   |                           |                |                              |
|------------------------|---------------------------|----------------|------------------------------|
|                        | <b>F-value</b>            | <b>p-value</b> | <b><math>\eta_p^2</math></b> |
| PTSD Severity          | 0.06                      | 0.81           | 0.001                        |
| Cannabis Group         | 1.03                      | 0.31           | 0.013                        |
| PTSD x Cannabis        | 11.32                     | 0.001          | 0.130                        |
| <b>Simple Effects</b>  |                           |                |                              |
|                        | <b><math>\beta</math></b> | <b>t-value</b> | <b>p-value</b>               |
| Minimal Cannabis Users | -0.343                    | -2.40          | 0.019                        |
| Regular Cannabis Users | 0.396                     | 2.37           | 0.020                        |

**Note.** Analyses conducted on the larger sample subset recruited for this study ( $n=79$  after removal of outliers and missing data (see Methods section in Main Report)).

**Supplemental Table 2. PCL-5 Reexperiencing x Cannabis Group General linear model**

| <b>Omnibus Model</b>                         |                           |                |                              |
|----------------------------------------------|---------------------------|----------------|------------------------------|
|                                              | <b>F-value</b>            | <b>p-value</b> | <b><math>\eta_p^2</math></b> |
| PCL-Re-experiencing                          | 0.02                      | 0.88           | <0.001                       |
| Cannabis Group                               | 0.10                      | 0.76           | 0.001                        |
| PCL-Re-experiencing x Cannabis               | 13.63                     | <0.001         | 0.113                        |
| <b>Simple Effects of PCL-Re-experiencing</b> |                           |                |                              |
|                                              | <b><math>\beta</math></b> | <b>t-value</b> | <b>p-value</b>               |
| Minimal Cannabis Users                       | -0.361                    | -3.11          | 0.002                        |
| Regular Cannabis Users                       | 0.333                     | 2.25           | 0.026                        |

**Note.** PCL=PTSD Symptom Checklist.

**Supplemental Table 3. PCL-5 Avoidance x Cannabis Group General linear model**

| <b>Omnibus Model</b>                   |                           |                |                              |
|----------------------------------------|---------------------------|----------------|------------------------------|
|                                        | <b>F-value</b>            | <b>p-value</b> | <b><math>\eta_p^2</math></b> |
| PCL-Avoidance                          | 0.10                      | 0.76           | 0.001                        |
| Cannabis Group                         | 0.15                      | 0.70           | 0.001                        |
| PCL-Avoidance x Cannabis               | 12.57                     | <0.001         | 0.105                        |
| <b>Simple Effects of PCL-Avoidance</b> |                           |                |                              |
|                                        | <b><math>\beta</math></b> | <b>t-value</b> | <b>p-value</b>               |
| Minimal Cannabis Users                 | -0.309                    | -2.66          | 0.009                        |
| Regular Cannabis Users                 | 0.370                     | 2.43           | 0.017                        |

**Note.** PCL=PTSD Symptom Checklist.

**SUPPLEMENTARY TABLES CONTINUED**

**Supplemental Table 4. PCL-5 Negative Cognition and Mood x Cannabis Group General linear model**

| <b>Omnibus Model</b>                                       |                           |                |                              |
|------------------------------------------------------------|---------------------------|----------------|------------------------------|
|                                                            | <b>F-value</b>            | <b>p-value</b> | <b><math>\eta_p^2</math></b> |
| PCL-Negative Cognition & Mood                              | 0.07                      | 0.79           | 0.001                        |
| Cannabis Group                                             | 0.11                      | 0.74           | 0.001                        |
| PCL-Negative Cog/Mood x Cannabis                           | 11.38                     | 0.001          | 0.096                        |
| <b>Simple Effects of PCL-Negative Cognition &amp; Mood</b> |                           |                |                              |
|                                                            | <b><math>\beta</math></b> | <b>t-value</b> | <b>p-value</b>               |
| Minimal Cannabis Users                                     | -0.348                    | -2.87          | 0.005                        |
| Regular Cannabis Users                                     | 0.297                     | 2.01           | 0.047                        |

**Note.** PCL=PTSD Symptom Checklist.

**Supplemental Table 5. PCL-5 Hyperarousal x Cannabis Group General linear model**

| <b>Omnibus Model</b>                      |                           |                |                              |
|-------------------------------------------|---------------------------|----------------|------------------------------|
|                                           | <b>F-value</b>            | <b>p-value</b> | <b><math>\eta_p^2</math></b> |
| PCL-Hyperarousal                          | 0.01                      | 0.92           | <0.001                       |
| Cannabis Group                            | 0.07                      | 0.79           | 0.001                        |
| PCL- Hyperarousal x Cannabis              | 8.08                      | 0.005          | 0.070                        |
| <b>Simple Effects of PCL-Hyperarousal</b> |                           |                |                              |
|                                           | <b><math>\beta</math></b> | <b>t-value</b> | <b>p-value</b>               |
| Minimal Cannabis Users                    | -0.291                    | -2.56          | 0.012                        |
| Regular Cannabis Users                    | 0.271                     | 1.68           | 0.097                        |

**Note.** PCL=PTSD Symptom Checklist.

## SUPPLEMENTARY FIGURES

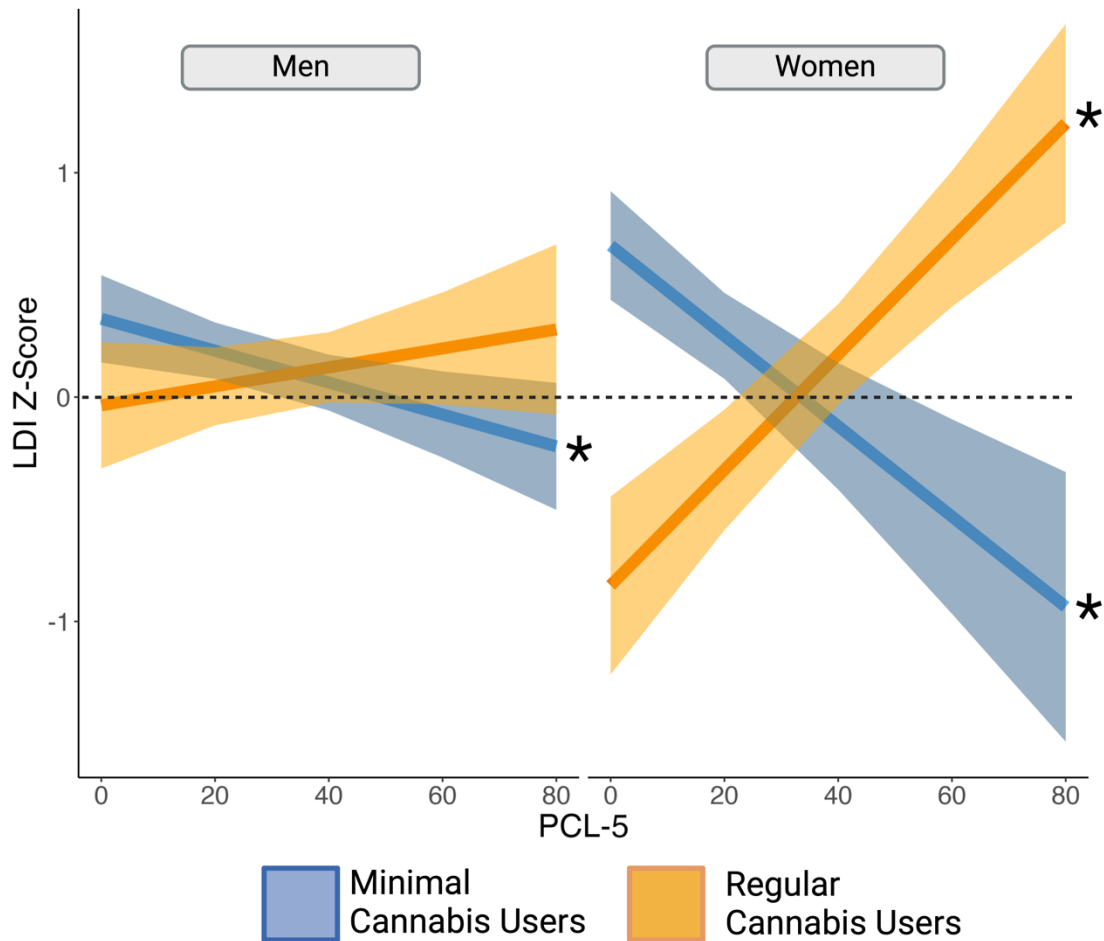**Supplemental Figure 1.**

Mnemonic pattern separation performance as a function of PTSD symptom severity and Sex in individuals who minimally use cannabis and in individuals with regular cannabis use. *Note.* LDI Z-Score = Lure discrimination index Z-scored; which measures mnemonic pattern separation performance. LDI was Z-scored within sample cohort (see Method). PCL-5 = PTSD Symptom Checklist for DSM-5. \* Simple slope effects:  $p < .05$ . Ribbon reflects standard error of the mean. See online article for the color version of this figure. Figure was created using R (*ggplot2*) and BioRender.com.
